# Supplementary material
Source: HighWire-hosted journal article supplement (https://erj.ersjournals.com/content/49/4/1602108)
Supplement: inline-supplementary-material-1 [file inline-supplementary-material-1.pdf]

## **Online Supplementary Material for:**

*Pseudomonas aeruginosa* adaptation and diversification in the non-Cystic Fibrosis  
bronchiectasis lung

**Yasmin Hilliam, Matthew P. Moore, Iain L. Lamont, Diana Bilton, Charles S. Haworth,  
Juliet Foweraker, Martin J. Walshaw, David Williams, Joanne L. Fothergill, Anthony  
De Soyza, Craig Winstanley**

## **Supplementary Methods**

### **Isolation of *P. aeruginosa* from sputum samples**

All samples were cultured for routine quantitative microbiology. Sputum was homogenised with equal parts of 0.1% (v/v) dithiothreitol, and the homogenised sample was diluted in sterile distilled water to 1 in 200 and 1 in 10,000. Both dilutions were spread by Whitley Automatic Spiral Plater (WASP) onto agar plates. Cultures on Columbia blood agar, chocolate agar and cysteine lactose electrolyte deficient agar (CLED) were incubated at 37°C in 5% (v/v) CO<sub>2</sub> for up to 48 h. Cultures on *Pseudomonas* agar plus CFC supplement (PCFC) were incubated at 37°C in air for up to 48 h and then checked for small colony variants (SCV) after incubating on the bench for up to a further 48 h. Colony forming unit (CFU) representatives of up to four colonial morphotypes were sub cultured and stored in 15% (v/v) Glycerol for archiving at -80°C.

### **DNA preparation and genome sequencing**

Genomic DNA was extracted from isolates using a Promega Wizard Genomic DNA Purification Kit, quantified using a Qubit 3.0 fluorometer (Qubit dsDNA broad range assay kit, Life Technologies) and tested for purity using a NanoDrop 1000 spectrophotometer (Thermo Scientific). Library preparation and whole-genome shotgun sequencing was performed by the Centre for Genomic Research at the University of Liverpool, UK using Illumina short read sequencing technology. Shotgun libraries were prepared from the normalised samples using TruSeq Nano library preparation kit. Following library preparation, paired-end sequencing (2 x 100 bp) was performed by multiplexing into one lane of the Illumina HiSeq platform and sequenced with SBS V4 chemistry.

Following processing, the raw Fastq files were trimmed for the presence of Illumina adapter sequences using Cutadapt version 1.2.1 [1]. The option `-O 3` was used so that the 3' end of any reads which match the adapter sequence for 3 bp or more were trimmed. The reads were further trimmed using Sickle (<https://github.com/najoshi/sickle>) version 1.200 with a minimum window quality score of 20. Reads shorter than 10 bp after trimming were removed. If only one read of a pair passed this filter, it was included in the R0 file, with files R1 and R2 containing corresponding paired-end sequences. Quality filtered and adapter trimmed short reads were *de novo* assembled and scaffolded using the A5 MiSeq assembler [2]. Genome assembly quality metrics such as N50, largest contig, and overall number of contigs were produced using QUAST [3].

### **Core genome SNP phylogeny**

The core genome was extracted using Panseq [4] and was defined as 500 bp fragments of all genomes in this study which matched with at least 85% similarity. A phylogenetic tree was approximated from core genome polymorphic sites, not including gaps or ambiguous bases by maximum likelihood with inner node bootstrap (n = 1000) and 10 discrete gamma

categories. All phylogenetic analyses were performed using MEGA6 [5] and visualised using the iTOL software [6]. Long branches were reduced for clarity.

### **Multilocus Sequence Typing**

MLST profiles were extracted based on the pubMLST *Pseudomonas aeruginosa* scheme (<http://pubmlst.org/paeruginosa/>) using a specific tool (<https://github.com/tseemann/mlst>).

It was not possible to extract complete MLST profiles from all genomes. In the context of this study, a lineage is defined on the basis of MLST profile and core genome SNP phylogeny.

### **Whole genome pairwise comparisons**

Pairwise comparisons between assembled genomes were performed using MUMmer 3.0 [7].

Any positions in the alignment with ambiguous nucleotides were removed.

### **Read mapping and variant calling**

All genome short read files (*fastq*) were mapped to reference genome PAO1 [8] using bwa-0.7.5a (mem) [9] producing a sequence alignment map (*sam*) files which were converted to binary alignment map files (*bam*) using picard tools-1.85

(<https://broadinstitute.github.io/picard/>). The reference genome was first indexed and sorted using bwa and SAMtools [10] respectively and a sequence dictionary created using picard tools-1.85. Variants were called following the Genome Analysis Toolkit (GATK) best practices workflow, as follows: duplicates were marked, the *bam* file indexed and sorted with picard tools-1.85, realignment targets created, INDELs realigned with GATK-3.3 [11] and variants called with the HaplotypeCaller module. Variants were filtered using vcfilter (<https://github.com/vcflib/vcflib>) with the standard parameters (DP >9, QUAL >10).

Resulting variant call files (*vcf*) were annotated to predict functional outcomes of variants compared with PAO1 genes using SnpEff [12]. Using SAMtools depth any variants within genes to which short reads had not aligned to 100% of its length were excluded from further analysis, leaving substitutions and short insertions or deletions (INDELs) and eliminating genes from functional variant analysis to which reads did not fully align due to sequencing error (lack of coverage) or genuine large deletions/complete absence.

### **Loss of function mutations**

Predicted loss of function mutations were inferred to have been acquired independently in the population if they differed by position or type between genomes. Where the position and type were the same they were inferred to be shared; in genes where a mutation was shared with other genomes, further loss of function mutations were assumed to have been acquired since the common, ancestral acquisition of the shared mutation.

### **Supplementary Tables:**

**Supplementary Table S1. Bacterial isolates used in this study. ST refers to the designated multilocus sequence type.** \*novel shared MLST and they cluster according to SNP phylogeny. Isolates C21-C23 cluster together according to core genome SNP phylogeny. Isolates included in the subset of 99 genomes are highlighted in red. The Mutator column indicates the presence of mutations associated with hypermutability (INDEL, causing a frameshift or STOP, introduction of a stop codon). **Of the 11 isolates carrying such a mutation, all but two (B113 and C78) were confirmed as having a hypermutable phenotype using assays reported previously [13].** Isolates labelled with the same letter from <sup>a</sup> to <sup>i</sup> were considered to be from the same lineage as each other on the basis of incomplete MLST profiles (see Table S2) and clustering by core genome SNP phylogeny (see Figure S1).

| Isolate ID | Center | Date       | Patient | ST               | Mutator             |
|------------|--------|------------|---------|------------------|---------------------|
| A1         | 1      | 09/10/2014 | 1       | 17               |                     |
| A2         | 1      | 16/10/2014 | 2       | 207              |                     |
| A3         | 1      | 10/10/2014 | 3       | 252              |                     |
| A4         | 1      | 10/10/2014 | 3       | 252              |                     |
| A5         | 1      | 10/10/2014 | 3       | 252              |                     |
| B3         | 12     | 01/11/2008 | 8       | 281              |                     |
| B16        | 12     | 25/11/2013 | 9       | 253              |                     |
| B34        | 12     | 03/09/2014 | 11      | 179              |                     |
| B37        | 12     | 18/01/2012 | 12      | -                |                     |
| B62        | 12     | 03/09/2014 | 15      | -                |                     |
| B113       | 12     | 23/10/2014 | 18      | 1328             | <i>mutL</i> (INDEL) |
| B114       | 12     | 11/04/2012 | 19      | 198              |                     |
| B199       | 12     | 18/10/2011 | 32      | 1182             |                     |
| A12        | 1      | 14/11/2014 | 35      | 179              |                     |
| C2         | 4      | 14/10/2009 | 36      | 253              |                     |
| C3         | 4      | 25/02/2010 | 37      | 260              |                     |
| C4         | 4      | 25/02/2010 | 37      | - <sup>a</sup>   |                     |
| C5         | 4      | 25/02/2010 | 37      | 260 <sup>a</sup> |                     |
| C6         | 4      | 03/03/2010 | 38      | 244              |                     |
| C7         | 4      | 23/03/2010 | 39      | 244              |                     |
| C10        | 4      | 16/04/2010 | 40      | 244              |                     |
| C8         | 4      | 16/04/2010 | 40      | 244              |                     |

|     |    |            |    |                 |                     |
|-----|----|------------|----|-----------------|---------------------|
| C9  | 4  | 16/04/2010 | 40 | 244             |                     |
| C11 | 4  | 19/08/2010 | 41 | 282             |                     |
| C12 | 4  | 20/08/2010 | 42 | 282             |                     |
| C13 | 4  | 20/08/2010 | 42 | 27 <sup>b</sup> |                     |
| C14 | 4  | 20/08/2010 | 42 | 27 <sup>b</sup> |                     |
| C15 | 4  | 20/08/2010 | 42 | 27 <sup>b</sup> |                     |
| C16 | 4  | 20/08/2010 | 42 | - <sup>b</sup>  |                     |
| C17 | 4  | 20/08/2010 | 42 | - <sup>b</sup>  |                     |
| C18 | 4  | 15/04/2011 | 43 | -               | <i>mutL</i> (STOP)  |
| C20 | 4  | 01/07/2011 | 44 | 878             |                     |
| C21 | 15 | 14/04/2009 | 45 | - <sup>c</sup>  |                     |
| C22 | 15 | 14/04/2009 | 45 | - <sup>c</sup>  |                     |
| C23 | 15 | 14/04/2009 | 45 | - <sup>c</sup>  |                     |
| C25 | 15 | 20/05/2009 | 46 | 253             |                     |
| C29 | 15 | 03/06/2009 | 48 | 252             |                     |
| C30 | 15 | 04/06/2009 | 49 | 252             |                     |
| C31 | 15 | 25/08/2009 | 50 | - <sup>d</sup>  | <i>mutL</i> (INDEL) |
| C32 | 15 | 25/08/2009 | 50 | - <sup>d</sup>  |                     |
| C33 | 15 | 25/08/2009 | 50 | - <sup>d</sup>  |                     |
| C36 | 15 | 21/05/2010 | 52 | 253             |                     |
| C42 | 15 | 12/07/2010 | 54 | 309             |                     |
| C43 | 15 | 28/07/2010 | 55 | 108             |                     |
| C44 | 15 | 28/07/2010 | 55 | 108             |                     |
| C45 | 15 | 28/07/2010 | 55 | 108             |                     |
| C49 | 15 | 22/02/2011 | 58 | 395             |                     |
| C51 | 15 | 23/02/2011 | 59 | 683             |                     |
| C54 | 15 | 15/06/2011 | 61 | 1342            |                     |
| C55 | 5  | 26/06/2009 | 62 | - <sup>e</sup>  |                     |
| C56 | 5  | 26/06/2009 | 62 | - <sup>e</sup>  |                     |
| C57 | 5  | 26/06/2009 | 62 | - <sup>e</sup>  |                     |
| C58 | 5  | 26/06/2009 | 62 | - <sup>e</sup>  |                     |
| C59 | 5  | 26/06/2009 | 62 | - <sup>e</sup>  |                     |
| C60 | 5  | 26/06/2009 | 62 | - <sup>e</sup>  |                     |
| C61 | 5  | 17/11/2009 | 63 | 620             |                     |
| C63 | 3  | 02/09/2009 | 64 | 27              |                     |
| C64 | 3  | 25/11/2009 | 65 | 274             |                     |
| C65 | 3  | 25/11/2009 | 65 | 274             |                     |
| C66 | 3  | 25/11/2009 | 65 | 274             |                     |
| C67 | 3  | 25/11/2009 | 65 | 274             |                     |
| C68 | 3  | 25/11/2009 | 65 | 274             |                     |
| C69 | 3  | 12/05/2010 | 66 | -               |                     |

|      |    |            |    |                  |                     |
|------|----|------------|----|------------------|---------------------|
| C71  | 9  | 04/09/2009 | 67 | 968              |                     |
| C73  | 9  | 05/11/2010 | 68 | 17               |                     |
| C74  | 9  | 03/12/2010 | 69 | 1202             | <i>mutL</i> (STOP)  |
| C76  | 2  | 12/05/2009 | 70 | 253              |                     |
| C77  | 2  | 03/07/2009 | 71 | 308              |                     |
| C78  | 2  | 14/07/2009 | 72 | 840              | <i>mutL</i> (INDEL) |
| C79  | 2  | 14/07/2009 | 72 | 620 <sup>f</sup> | <i>mutL</i> (STOP)  |
| C80  | 2  | 14/07/2009 | 72 | 620 <sup>f</sup> |                     |
| C81  | 2  | 14/07/2009 | 72 | 620 <sup>f</sup> |                     |
| C82  | 2  | 14/07/2009 | 72 | 620 <sup>f</sup> |                     |
| C83  | 2  | 14/07/2009 | 72 | - <sup>f</sup>   |                     |
| C84  | 2  | 14/07/2009 | 72 | 620 <sup>f</sup> |                     |
| C85  | 2  | 06/08/2009 | 73 | - <sup>g</sup>   |                     |
| C86  | 2  | 06/08/2009 | 73 | 308              |                     |
| C87  | 2  | 06/08/2009 | 73 | 179 <sup>g</sup> |                     |
| C88  | 2  | 15/12/2009 | 74 | 1251             |                     |
| C89  | 2  | 25/03/2010 | 75 | 1239             |                     |
| C91  | 2  | 13/01/2011 | 76 | 253              |                     |
| C92  | 2  | 01/02/2011 | 77 | 252              |                     |
| C94  | 10 | 03/07/2009 | 78 | 395              |                     |
| C95  | 10 | 29/07/2009 | 79 | 253              |                     |
| C96  | 10 | 29/07/2009 | 79 | 253              |                     |
| C97  | 10 | 29/07/2009 | 79 | 253              |                     |
| C98  | 10 | 29/07/2009 | 79 | 253              |                     |
| C99  | 10 | 29/07/2009 | 79 | 253              |                     |
| C100 | 10 | 13/10/2009 | 80 | 612              |                     |
| C101 | 10 | 21/10/2009 | 81 | - <sup>h</sup>   |                     |
| C102 | 10 | 21/10/2009 | 81 | - <sup>h</sup>   |                     |
| C103 | 10 | 21/10/2009 | 81 | - <sup>h</sup>   |                     |
| C104 | 13 | 16/05/2009 | 82 | 179              |                     |
| C105 | 13 | 25/07/2009 | 83 | 840              |                     |
| C106 | 13 | 11/08/2009 | 84 | - <sup>i</sup>   |                     |
| C107 | 13 | 11/08/2009 | 84 | 253              |                     |
| C108 | 13 | 11/08/2009 | 84 | 179 <sup>i</sup> |                     |
| C109 | 13 | 11/08/2009 | 85 | 840              |                     |
| C110 | 13 | 11/08/2009 | 85 | 179              |                     |
| C111 | 13 | 11/08/2009 | 85 | 179              |                     |
| C112 | 13 | 11/08/2009 | 85 | 179              |                     |
| C114 | 13 | 05/12/2009 | 86 | 179              |                     |
| C115 | 13 | 05/12/2009 | 86 | 179              |                     |
| C116 | 13 | 04/06/2010 | 87 | 871              |                     |

|      |    |            |     |      |                     |
|------|----|------------|-----|------|---------------------|
| C117 | 13 | 04/06/2010 | 87  | 871  |                     |
| C118 | 13 | 04/06/2010 | 87  | 871  |                     |
| C119 | 7  | 23/01/2010 | 88  | -    |                     |
| C120 | 7  | 29/01/2010 | 89  | -    |                     |
| C123 | 7  | 02/04/2010 | 90  | 27   | <i>mutS</i> (INDEL) |
| C124 | 7  | 08/04/2010 | 91  | 1753 |                     |
| C125 | 7  | 29/04/2010 | 92  | 253  |                     |
| C126 | 7  | 29/04/2010 | 92  | 253  |                     |
| C127 | 7  | 29/04/2010 | 92  | 164  | <i>mutS</i> (INDEL) |
| C128 | 7  | 29/04/2010 | 92  | 164  |                     |
| C129 | 7  | 29/04/2010 | 92  | 871  | <i>mutL</i> (INDEL) |
| C131 | 7  | 08/05/2010 | 93  | 253  |                     |
| C133 | 7  | 28/05/2010 | 94  | 253  | <i>mutS</i> (INDEL) |
| C134 | 7  | 19/12/2010 | 95  | 253  | <i>mutS</i> (INDEL) |
| C135 | 14 | 02/11/2009 | 96  | 160  |                     |
| C137 | 14 | 16/04/2010 | 97  | 260  |                     |
| C139 | 14 | 08/09/2010 | 98  | 2102 |                     |
| C141 | 14 | 01/10/2010 | 99  | 2102 |                     |
| C142 | 14 | 11/02/2011 | 100 | 252  |                     |
| C143 | 8  | 08/07/2010 | 101 | 253  |                     |
| C144 | 8  | 08/07/2010 | 101 | 253  |                     |
| C145 | 8  | 08/07/2010 | 101 | 253  |                     |
| C146 | 8  | 25/06/2010 | 102 | 395  |                     |
| C147 | 8  | 25/06/2010 | 102 | 395  |                     |
| C148 | 8  | 25/06/2010 | 102 | 395  |                     |
| C149 | 8  | 22/03/2011 | 103 | 108  |                     |
| C150 | 6  | 27/08/2010 | 104 | 253  |                     |
| C151 | 6  | 03/03/2011 | 105 | 1244 |                     |
| C153 | 6  | 07/04/2011 | 106 | 155  |                     |
| C155 | 11 | 04/12/2010 | 107 | 1211 |                     |
| C156 | 16 | 16/11/2010 | 108 | 260  |                     |
| C158 | 16 | 03/12/2010 | 109 | 155  |                     |
| C159 | 16 | 09/12/2010 | 110 | 260  |                     |
| C160 | 16 | 09/12/2010 | 111 | 1244 |                     |
| C161 | 16 | 03/03/2011 | 112 | 110  |                     |
| C164 | 16 | 08/12/2010 | 113 | -    |                     |
| C167 | 16 | 21/04/2011 | 114 | 296  |                     |
| C168 | 16 | 21/12/2010 | 115 | 17   |                     |
| A19  | 1  | 16/12/2014 | 120 | -    |                     |
| A163 | 1  | 19/05/2015 | 137 | 146  |                     |
| A36  | 1  | 17/02/2015 | 137 | 146  |                     |



|      |   |            |     |     |  |
|------|---|------------|-----|-----|--|
| A46  | 1 | 07/04/2015 | 147 | 17  |  |
| A48  | 1 | 07/04/2015 | 147 | 17  |  |
| A52  | 1 | 07/04/2015 | 147 | 17  |  |
| A53  | 1 | 07/04/2015 | 147 | 17  |  |
| A54  | 1 | 07/04/2015 | 147 | 17  |  |
| A55  | 1 | 07/04/2015 | 147 | 17  |  |
| A56  | 1 | 07/04/2015 | 147 | 17  |  |
| A58  | 1 | 07/04/2015 | 147 | 17  |  |
| A60  | 1 | 07/04/2015 | 147 | 17  |  |
| A70  | 1 | 07/04/2015 | 147 | 17  |  |
| A71  | 1 | 07/04/2015 | 147 | 17  |  |
| A72  | 1 | 07/04/2015 | 147 | 17  |  |
| A73  | 1 | 07/04/2015 | 147 | 17  |  |
| A75  | 1 | 07/04/2015 | 147 | 17  |  |
| A76  | 1 | 07/04/2015 | 147 | 17  |  |
| A100 | 1 | 07/04/2015 | 148 | 17  |  |
| A106 | 1 | 07/04/2015 | 148 | 175 |  |
| A107 | 1 | 07/04/2015 | 148 | 175 |  |
| A77  | 1 | 07/04/2015 | 148 | 175 |  |
| A78  | 1 | 07/04/2015 | 148 | 17  |  |
| A80  | 1 | 07/04/2015 | 148 | 175 |  |
| A81  | 1 | 07/04/2015 | 148 | 17  |  |
| A82  | 1 | 07/04/2015 | 148 | 17  |  |
| A85  | 1 | 07/04/2015 | 148 | 175 |  |
| A86  | 1 | 07/04/2015 | 148 | 175 |  |
| A90  | 1 | 07/04/2015 | 148 | 175 |  |
| A91  | 1 | 07/04/2015 | 148 | 175 |  |
| A92  | 1 | 07/04/2015 | 148 | 175 |  |
| A95  | 1 | 07/04/2015 | 148 | 175 |  |
| A97  | 1 | 07/04/2015 | 148 | 175 |  |
| A119 | 1 | 15/05/2015 | 149 | 667 |  |
| A122 | 1 | 15/05/2015 | 149 | 667 |  |
| A123 | 1 | 15/05/2015 | 149 | 667 |  |
| A126 | 1 | 15/05/2015 | 149 | 667 |  |
| A130 | 1 | 15/05/2015 | 149 | 667 |  |
| A134 | 1 | 15/05/2015 | 149 | 667 |  |
| A137 | 1 | 15/05/2015 | 149 | 667 |  |
| A141 | 1 | 15/05/2015 | 149 | 667 |  |
| A144 | 1 | 15/05/2015 | 149 | 667 |  |
| A147 | 1 | 15/05/2015 | 149 | 667 |  |
| A148 | 1 | 15/05/2015 | 149 | 667 |  |

|      |   |            |     |     |  |
|------|---|------------|-----|-----|--|
| A151 | 1 | 15/05/2015 | 149 | 667 |  |
| A154 | 1 | 15/05/2015 | 149 | 667 |  |
| A156 | 1 | 15/05/2015 | 149 | 667 |  |
|      |   |            |     |     |  |

**Supplementary Table S2. MLST profiles of isolates where incomplete profiles were obtained or the MLST profile was novel.**

| Isolate     | ST    | Closest ST                          | <i>Pseudomonas aeruginosa</i> MLST<br>loci allele numbers |            |            |            |            |            |            |
|-------------|-------|-------------------------------------|-----------------------------------------------------------|------------|------------|------------|------------|------------|------------|
|             |       |                                     | <i>acs</i>                                                | <i>aro</i> | <i>gua</i> | <i>mut</i> | <i>nuo</i> | <i>pps</i> | <i>trp</i> |
| <b>A19</b>  | NF    | 92 or 261                           | 105                                                       | 5          | 30         | -          | 1          | 4          | 14         |
| <b>B37</b>  | Novel |                                     | 107                                                       | 4          | 3          | 27         | 12         | 7          | 128        |
| <b>B62</b>  | NF    | 1404                                | 16                                                        | -          | 6          | 3          | 4          | 7          | 1          |
| <b>C101</b> | NF    | 303 (4 loci)                        | 16                                                        | -          | 12         | 18         | 3          | 4          | 9          |
| <b>C102</b> | NF    | 304 (4 loci)                        | 16                                                        | -          | 12         | 18         | 3          | 4          | 9          |
| <b>C103</b> | NF    | 305 (4 loci)                        | 16                                                        | -          | 12         | 18         | 3          | 4          | 9          |
| <b>C106</b> | NF    | 156,179,353,1494 (6 loci)           | -                                                         | 27         | 28         | 3          | 4          | 13         | 7          |
| <b>C119</b> | Novel |                                     | 5                                                         | 1          | 109        | 3          | 1          | 1          | 47         |
| <b>C120</b> | Novel |                                     | 17                                                        | 5          | 11         | 5          | 4          | 29         | 2          |
| <b>C164</b> | NF    | 1240,1985 (4 loci)                  | 28                                                        | 5          | 46         | 5          | 1          | -          | 61         |
| <b>C16</b>  | NF    | 27,120,2314 (5 loci)                | 6                                                         | -          | 6          | 113        | 4          | 6          | 7          |
| <b>C17</b>  | NF    | 27,120,2314 (5 loci)                | 6                                                         | -          | 6          | 113        | 4          | 6          | 7          |
| <b>C18</b>  | NF    | 158,179,180,1496,2063,2109 (6 loci) | 36                                                        | 27         | 28         | -          | 4          | 13         | 7          |
| <b>C21</b>  | Novel |                                     | 22                                                        | 6          | 1          | 3          | 1          | 76         | 1          |
| <b>C22</b>  | Novel |                                     | 22                                                        | 6          | 1          | 3          | 1          | 76         | 1          |
| <b>C23</b>  | Novel |                                     | 22                                                        | 6          | 1          | 3          | 1          | 76         | 1          |
| <b>C31</b>  | NF    | 155,677,1276 (5 loci)               | 28                                                        | 5          | 36         | -          | 3          | 13         | 7          |

|            |       |                              |    |    |    |     |    |    |    |
|------------|-------|------------------------------|----|----|----|-----|----|----|----|
| <b>C32</b> | NF    | 155,677,1276 (5 loci)        | 28 | 5  | 36 | -   | 3  | 13 | 7  |
| <b>C33</b> | NF    | 155,677,1276 (5 loci)        | 28 | 5  | 36 | -   | 3  | 13 | 7  |
| <b>C4</b>  | NF    | 260 (6 loci)                 | 14 | 5  | -  | 7   | 4  | 13 | 7  |
| <b>C55</b> | Novel |                              | 28 | 5  | 11 | 11  | 15 | 75 | 1  |
| <b>C56</b> | Novel |                              | 28 | 5  | 11 | 11  | 15 | 75 | 1  |
| <b>C57</b> | Novel |                              | 28 | 5  | 11 | 11  | 15 | 75 | 1  |
| <b>C58</b> | Novel |                              | 28 | 5  | 11 | 11  | 15 | 75 | 1  |
| <b>C59</b> | Novel |                              | 28 | 5  | 11 | 11  | 15 | 75 | 1  |
| <b>C60</b> | Novel |                              | 28 | 5  | 11 | 11  | 15 | 75 | 1  |
| <b>C69</b> | NF    | 1707, 2055 (6 loci)          | 16 | 24 | 1  | 149 | 4  | -  | 19 |
| <b>C83</b> | NF    | 620 (6 loci)                 | 9  | 7  | 63 | 13  | 8  | -  | 8  |
| <b>C85</b> | NF    | 156, 179, 353, 1494 (6 loci) | -  | 27 | 28 | 3   | 4  | 13 | 7  |

**Table S3. Clonal lineages isolated from multiple patients within individual centres.** Sets of isolates from different patients attending the same centre are grouped by clonal lineage. For each such group, whole genome pairwise comparisons were carried out to determine the number of variant SNPs and INDELs. \*These isolates share a novel MLST profile and they cluster according to SNP phylogeny.

| Isolate | Centre | Isolation date | Patient | MLST | Comparison | SNPs   | INDELs |
|---------|--------|----------------|---------|------|------------|--------|--------|
| C6      | 4      | 03/03/2010     | 38      | 244  | C6-C7      | 179    | 8      |
|         |        |                |         |      | C6-C8      | 3790   | 79     |
| C7      | 4      | 23/03/2010     | 39      | 244  | C6-C9      | 3733   | 74     |
|         |        |                |         |      | C6-C10     | 3833   | 62     |
| C8      | 4      | 16/04/2010     | 40      | 244  | C7-C8      | 3736   | 82     |
|         |        |                |         |      | C7-C9      | 3714   | 75     |
| C9      | 4      | 16/04/2010     | 40      | 244  | C8-C9      | 281    | 5      |
|         |        |                |         |      | C7-C10     | 3929   | 65     |
| C10     | 4      | 16/04/2010     | 40      | 244  | C8-C10     | 603    | 14     |
|         |        |                |         |      | C9-C10     | 515    | 11     |
|         |        |                |         |      |            |        |        |
| C11     | 4      | 19/08/2010     | 41      | 282  | C11-C12    | 340    | 8      |
| C12     | 4      | 20/08/2010     | 42      | 282  |            |        |        |
|         |        |                |         |      |            |        |        |
| C29     | 15     | 03/06/2009     | 48      | 252  | C29-C30    | 168    | 3      |
| C30     | 15     | 04/06/2009     | 49      | 252  |            |        |        |
| C25     | 15     | 20/05/2009     | 46      | 253  | C25-C36    | 3428   | 43     |
| C36     | 15     | 21/05/2010     | 52      | 253  |            |        |        |
| C91     | 2      | 13/01/2011     | 76      | 253  | C76-C91    | 846    | 5      |
| C76     | 2      | 12/05/2009     | 70      | 253  |            |        |        |
|         |        |                |         |      |            |        |        |
| C77     | 2      | 03/07/2009     | 71      | 308  | C77-C86    | 277    | 1      |
| C86     | 2      | 06/08/2009     | 73      | 308  |            |        |        |
| C105    | 13     | 25/07/2009     | 83      | 840  | C105-C109  | 131    | 8      |
|         |        |                |         |      |            |        |        |
| C109    | 13     | 11/08/2009     | 85      | 840  |            |        |        |
| C104    | 13     | 16/05/2009     | 82      | 179  | C104-C108  | 10,551 | 114    |
|         |        |                |         |      | C104-C110  | 2863   | 39     |
|         |        |                |         |      | C104-C111  | 2765   | 52     |
| C108    | 13     | 11/08/2009     | 84      | 179  | C104-C112  | 1913   | 25     |
|         |        |                |         |      | C104-C114  | 6795   | 96     |
|         |        |                |         |      | C104-C115  | 6972   | 105    |
| C110    | 13     | 11/08/2009     | 85      | 179  | C108-C110  | 4780   | 78     |
|         |        |                |         |      | C108-C111  | 4852   | 66     |
|         |        |                |         |      | C108-C112  | 3780   | 62     |

|      |    |            |     |        |           |        |     |
|------|----|------------|-----|--------|-----------|--------|-----|
| C111 | 13 | 11/08/2009 | 85  | 179    | C108-C114 | 10,963 | 136 |
|      |    |            |     |        | C108-C115 | 10,833 | 133 |
|      |    |            |     |        | C110-C111 | 176    | 8   |
| C112 | 13 | 11/08/2009 | 85  | 179    | C110-C112 | 198    | 7   |
|      |    |            |     |        | C110-C114 | 3115   | 40  |
|      |    |            |     |        | C110-C115 | 3107   | 45  |
| C114 | 13 | 05/12/2009 | 86  | 179    | C111-C112 | 148    | 4   |
|      |    |            |     |        | C111-C114 | 2838   | 43  |
|      |    |            |     |        | C111-C115 | 2789   | 57  |
| C115 | 13 | 05/12/2009 | 86  | 179    | C112-C114 | 1941   | 29  |
|      |    |            |     |        | C112-C115 | 1895   | 31  |
|      |    |            |     |        | C114-C115 | 281    | 4   |
|      |    |            |     |        |           |        |     |
| C125 | 7  | 29/04/2010 | 92  | 253    | C125-C126 | 736    | 27  |
|      |    |            |     |        | C125-C131 | 1159   | 22  |
| C126 | 7  | 29/04/2010 | 92  | 253    | C125-C133 | 872    | 22  |
|      |    |            |     |        | C125-C134 | 817    | 21  |
| C131 | 7  | 08/05/2010 | 93  | 253    | C126-C131 | 9636   | 99  |
|      |    |            |     |        | C126-C133 | 5847   | 71  |
| C133 | 7  | 28/05/2010 | 94  | 253    | C126-C134 | 5883   | 70  |
|      |    |            |     |        | C131-C133 | 3486   | 40  |
| C134 | 7  | 19/12/2010 | 95  | 253    | C131-C134 | 3400   | 38  |
|      |    |            |     |        | C133-C134 | 330    | 4   |
|      |    |            |     |        |           |        |     |
| C156 | 16 | 16/11/2010 | 108 | 260    | C156-C159 | 160    | 3   |
| C159 | 16 | 09/12/2010 | 110 | 260    |           |        |     |
|      |    |            |     |        |           |        |     |
| C139 | 14 | 08/09/2010 | 98  | ST2102 | C139-C141 | 177    | 3   |
| C141 | 14 | 01/10/2010 | 99  | ST2102 |           |        |     |

Supplementary Table S4 and Figure S1 are provided in additional files:

Table S4. Clone-specific deletions, relative to PAO1

Figure S1. Core genome SNP phylogeny showing the distribution of bronchiectasis isolates. The figure shows analysis of the genomes of all bronchiectasis isolates used in this study (highlighted in blue) alongside 331 genomes from Kos et al. [14] and the genomes of commonly studied strains PAO1 (labelled PAO1107), PA14 (UCBPPPA14109), PA7 and LESB58. Line colours indicate the two major clusters of *P. aeruginosa* (I, green; II, blue) as well as those isolates not clustering in the two main groups (red).

Figure S2. Distribution of loss of function mutations. For the genes listed in Table 2, where the number of independent occurrences of a loss of function mutation was equal to or greater than five, the Figure indicates the number of isolates carrying mutations in 0, 1, 2, 3, 4, 5 or 6 of these genes.

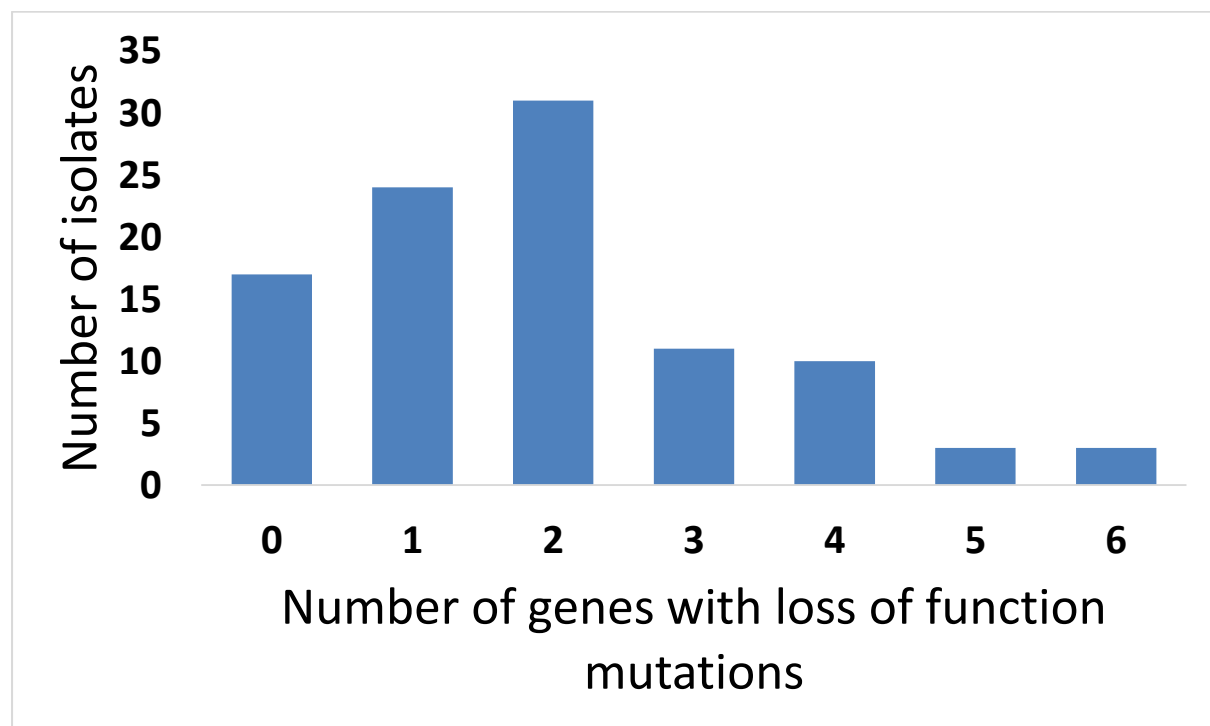

Table S5. Full list of loss of function mutations identified by variant calling. Available via the Figshare link <https://figshare.com/s/ff426bae75ee64804aa1>

Table S6. Loss of function mutations present in each bronchiectasis isolate genome. For the genes listed in Table 2, where the number of independent occurrences of a loss of function mutation was equal to or greater than five, the genes carrying such mutations are shown for each of the bronchiectasis isolates. 17 of the 99 isolates carried none of these mutations. It is worth noting that isolates found co-infecting individual patients did not share the same mutation profile (C125, C127

and C129 in patient 92; C12 and C13 in patient 42; C78 and C79 in patient 72; C86 and C87 in patient 73; C107 and C108 in patient 84; C109 and C110 in patient 85; A100 and A106 in patient 148).

| Isolate | Number<br>of Table2<br>genes<br>with loss<br>of<br>function<br>mutations | Mutations |        |       |       |       |      |
|---------|--------------------------------------------------------------------------|-----------|--------|-------|-------|-------|------|
| C125    | 6                                                                        | PA4469    | mexS   | ladS  | rbdA  | betT2 | mexA |
| C74     | 6                                                                        | PA4469    | mexS   | chpA  | mutL  | pchE  | mexB |
| C87     | 6                                                                        | PA4469    | bifA   | pchE  | ladS  | chpA  | mexA |
| C123    | 5                                                                        | rbdA      | PA4469 | pchE  | mexS  | oprM  |      |
| C116    | 5                                                                        | PA4469    | mucA   | mexB  | oprF  | pchE  |      |
| C88     | 5                                                                        | mucA      | pcoA   | betT2 | oprF  | mexA  |      |
| C100    | 4                                                                        | rbdA      | PA4469 | mucA  | chpA  |       |      |
| C79     | 4                                                                        | rbdA      | PA4469 | mucA  | mutL  |       |      |
| C133    | 4                                                                        | rbdA      | mucA   | pchE  | oprM  |       |      |
| C95     | 4                                                                        | rbdA      | mucA   | oprM  | pcoA  |       |      |
| B16     | 4                                                                        | rbdA      | mucA   | mexB  | fimV  |       |      |
| C21     | 4                                                                        | PA4469    | mucA   | mexB  | pcoA  |       |      |
| C31     | 4                                                                        | PA4469    | mucA   | mutL  | fimV  |       |      |
| C110    | 4                                                                        | PA4469    | mucA   | oprF  | mexA  |       |      |
| C108    | 4                                                                        | mexB      | chpA   | mucA  | betT2 |       |      |
| C129    | 4                                                                        | mucA      | mexB   | oprF  | gmd   |       |      |
| C134    | 3                                                                        | rbdA      | mucA   | oprM  |       |       |      |
| C143    | 3                                                                        | rbdA      | mucA   | mexB  |       |       |      |
| C2      | 3                                                                        | rbdA      | mexB   | chpA  |       |       |      |
| A119    | 3                                                                        | PA4469    | oprF   | pcoA  |       |       |      |
| A46     | 3                                                                        | PA4469    | mucA   | oprF  |       |       |      |
| C63     | 3                                                                        | betT2     | ladS   | fimV  |       |       |      |
| C114    | 3                                                                        | mexB      | pchE   | betT2 |       |       |      |
| A163    | 3                                                                        | mucA      | mexB   | gmd   |       |       |      |
| C149    | 3                                                                        | mucA      | pchE   | oprM  |       |       |      |
| C55     | 3                                                                        | mucA      | pilJ   | oprF  |       |       |      |
| B113    | 3                                                                        | pilJ      | mutL   | pcoA  |       |       |      |
| C124    | 2                                                                        | PA0054    | mucA   |       |       |       |      |
| C146    | 2                                                                        | PA0054    | mexA   |       |       |       |      |
| C49     | 2                                                                        | PA0054    | betT2  |       |       |       |      |
| C51     | 2                                                                        | PA0054    | rbdA   |       |       |       |      |
| B114    | 2                                                                        | rbdA      | mexB   |       |       |       |      |
| C25     | 2                                                                        | rbdA      | mexB   |       |       |       |      |
| C36     | 2                                                                        | rbdA      | mucA   |       |       |       |      |
| C86     | 2                                                                        | rbdA      | mexA   |       |       |       |      |

|      |   |        |        |
|------|---|--------|--------|
| C20  | 2 | rbdA   | pilJ   |
| C137 | 2 | rbdA   | PA4469 |
| C6   | 2 | PA4469 | mexS   |
| C7   | 2 | PA4469 | mexS   |
| C135 | 2 | mucA   | mexS   |
| C61  | 2 | PA4469 | mexA   |
| C42  | 2 | PA4469 | oprF   |
| A100 | 2 | PA4469 | fimV   |
| B62  | 2 | PA4469 | pilJ   |
| C131 | 2 | betT2  | ladS   |
| B34  | 2 | bifA   | betT2  |
| C12  | 2 | bifA   | betT2  |
| C11  | 2 | bifA   | betT2  |
| A1   | 2 | bifA   | ladS   |
| B3   | 2 | fimV   | pcoA   |
| C167 | 2 | mexA   | gmd    |
| C3   | 2 | pilJ   | mexB   |
| A2   | 2 | mucA   | mexB   |
| C153 | 2 | mexB   | oprF   |
| C158 | 2 | mexB   | oprF   |
| C161 | 2 | mucA   | pcoA   |
| C18  | 2 | oprM   | mutL   |
| C155 | 2 | pilJ   | oprM   |
| C94  | 1 | PA0054 |        |
| C120 | 1 | rbdA   |        |
| A3   | 1 | rbdA   |        |
| C77  | 1 | rbdA   |        |
| C91  | 1 | rbdA   |        |
| C69  | 1 | rbdA   |        |
| C156 | 1 | rbdA   |        |
| C159 | 1 | rbdA   |        |
| C107 | 1 | betT2  |        |
| C119 | 1 | bifA   |        |
| A106 | 1 | bifA   |        |
| C43  | 1 | bifA   |        |
| B199 | 1 | gmd    |        |
| C89  | 1 | gmd    |        |
| C168 | 1 | gmd    |        |
| A12  | 1 | mexB   |        |
| C54  | 1 | mexB   |        |
| C92  | 1 | mucA   |        |
| C10  | 1 | mucA   |        |
| C73  | 1 | mucA   |        |
| C142 | 1 | mucA   |        |
| C76  | 1 | mucA   |        |
| B37  | 1 | mucA   |        |



C101 1 oprM

**Table S7.** The presence or absence of virulence genes amongst the non-CF BE isolate genomes. Available via the Figshare link <https://figshare.com/s/626a59cfd94b13e5cf71>

## References

1. Martin M. Cutadapt removes adapter sequences from high-throughout sequencing reads. *EMBnet J* 2011; 17(1): 10-12.
2. Coil D, Jospin G, Darling AE. A5-miseq: an updated pipeline to assemble microbial genomes from Illumina MiSeq data. *Bioinformatics* 2015; 31(4): 587-589.
3. Gurevich A, Saveliev V, Vyahhi N, Tesler G. QUAST: quality assessment tool for genome assemblies. *Bioinformatics* 2013; 29(8): 1072-1075.
4. Laing C, Buchanan C, Taboada EN, Zhang Y, Kropinski A, Villegas A, Thomas JE, Gannon VP. Pan-genome sequence analysis using Panseq: an online tool for the rapid analysis of core and accessory genomic regions. *BMC bioinformatics* 2010; 11: 461.
5. Tamura K, Stecher G, Peterson D, Filipinski A, Kumar S. MEGA6: Molecular Evolutionary Genetics Analysis version 6.0. *Mol Biol Evol* 2013; 30(12): 2725-2729.
6. Letunic I, Bork P. Interactive Tree Of Life (iTOL): an online tool for phylogenetic tree display and annotation. *Bioinformatics* 2007; 23(1): 127-128.
7. Kurtz S, Phillippy A, Delcher AL, Smoot M, Shumway M, Antonescu C, Salzberg SL. Versatile and open software for comparing large genomes. *Genome biology* 2004; 5(2): R12.
8. Stover CK, Pham XQ, Erwin AL, Mizoguchi SD, Warrenner P, Hickey MJ, Brinkman FS, Hufnagle WO, Kowalik DJ, Lagrou M, Garber RL, Goltry L, Tolentino E, Westbrook-Wadman S, Yuan Y, Brody LL, Coulter SN, Folger KR, Kas A, Larbig K, Lim R, Smith K, Spencer D, Wong GK, Wu Z, Paulsen IT, Reizer J, Saier MH, Hancock RE, Lory S, Olson MV. Complete genome sequence of *Pseudomonas aeruginosa* PA01, an opportunistic pathogen. *Nature* 2000; 406(6799): 959-964.
9. Li H, Durbin R. Fast and accurate short read alignment with Burrows-Wheeler transform. *Bioinformatics* 2009; 25(14): 1754-1760.
10. Li H, Handsaker B, Wysoker A, Fennell T, Ruan J, Homer N, Marth G, Abecasis G, Durbin R, Genome Project Data Processing S. The Sequence Alignment/Map format and SAMtools. *Bioinformatics* 2009; 25(16): 2078-2079.
11. McKenna A, Hanna M, Banks E, Sivachenko A, Cibulskis K, Kernytsky A, Garimella K, Altshuler D, Gabriel S, Daly M, DePristo MA. The Genome Analysis Toolkit: a MapReduce framework for analyzing next-generation DNA sequencing data. *Genome research* 2010; 20(9): 1297-1303.
12. Cingolani P, Platts A, Wang le L, Coon M, Nguyen T, Wang L, Land SJ, Lu X, Ruden DM. A program for annotating and predicting the effects of single nucleotide polymorphisms, SnpEff: SNPs in the genome of *Drosophila melanogaster* strain w1118; iso-2; iso-3. *Fly (Austin)* 2012; 6(2): 80-92.
13. Mowat E, Paterson S, Fothergill JL, Wright EA, Ledson MJ, Walshaw MJ, Brockhurst MA, Winstanley C. *Pseudomonas aeruginosa* population diversity and turnover in cystic fibrosis chronic infections. *AmJRespirCrit Care Med* 2011; 183(12): 1674-1679.
14. Kos VN, Deraspe M, McLaughlin RE, Whiteaker JD, Roy PH, Alm RA, Corbeil J, Gardner H. The resistome of *Pseudomonas aeruginosa* in relationship to phenotypic susceptibility. *Antimicrobial agents and chemotherapy* 2015; 59(1): 427-436.
