# Supplementary material
Source: HighWire-hosted journal article supplement (https://erj.ersjournals.com/content/49/4/1602108)
Supplement: inline-supplementary-material-3 [file inline-supplementary-material-3.pdf]

Table S4. Clone-specific deletions relative to PAO1.

| Isolate* | Deleted DNA† |         | Size of deletion (bp) | Deleted Genes‡ |        |
|----------|--------------|---------|-----------------------|----------------|--------|
|          | From         | To      |                       | From           | To     |
| A12      | 2448472      | 2723305 | 274833                | PA2226         | PA2427 |
| A119     | 2443094      | 2624360 | 181189                | PA2221         | PA2373 |
| A119     | 5455322      | 5497400 | 42078                 | PA4857         | PA4900 |
| A163     | 2543016      | 2705463 | 162447                | PA2305         | PA2421 |
| A19      | 2420900      | 2721500 | 300600                | PA2201         | PA2425 |
| A78      | 2439040      | 2574546 | 135506                | PA2218         | PA2333 |
| B34      | 1979190      | 2015165 | 35975                 | PA1820         | PA1856 |
| B62      | 2461847      | 2686720 | 224873                | PA2237         | PA2402 |
| C100     | 2443095      | 2724005 | 280910                | PA2221         | PA2428 |
| C101     | 2452047      | 2578374 | 126327                | PA2229         | PA2335 |
| C119     | 2184340      | 2247131 | 62791                 | PA1997         | PA2053 |
| C119     | 2487183      | 2689945 | 202762                | PA2258         | PA2406 |
| C125     | 2439064      | 2729482 | 290418                | PA2218         | PA2432 |
| C135     | 2443095      | 2588618 | 145523                | PA2221         | PA2343 |
| C137     | 2453340      | 2560360 | 107020                | PA2231         | PA2321 |
| C155     | 2440000      | 2585490 | 145490                | PA2218         | PA2431 |
| C156     | 2439060      | 2475845 | 36785                 | PA2218         | PA2249 |
| C164     | 2248926      | 2451500 | 202574                | PA2055         | PA2228 |
| C164     | 2793790      | 2810695 | 16905                 | PA2475         | PA2494 |
| C164     | 3914150      | 3930740 | 16590                 | PA3497         | PA3514 |
| C21      | 2439057      | 2713422 | 274365                | PA2218         | PA2424 |
| C22      | 2209250      | 2442066 | 232816                | PA2018         | PA2220 |
| C4       | 111095       | 211425  | 100330                | PA0091         | PA0781 |
| C4       | 2439055      | 2666000 | 226945                | PA2218         | PA2400 |
| C44      | 2443095      | 2615075 | 171980                | PA2221         | PA2365 |
| C5       | 3841807      | 3873962 | 32155                 | PA3434         | PA3463 |
| C51      | 2071372      | 2199654 | 128282                | PA1900         | PA2010 |
| C54      | 762796       | 789380  | 26584                 | PA0691         | PA0717 |
| C54      | 2410960      | 2478550 | 67590                 | PA2191         | PA2251 |
| C54      | 2628400      | 2817536 | 189136                | PA2377         | PA2500 |
| C61      | 4005650      | 4016519 | 10869                 | PA3573         | PA3584 |
| C6       | 2448920      | 2689471 | 240551                | PA2227         | PA2405 |
| C73      | 2460955      | 2584136 | 123181                | PA2236         | PA2399 |
| C87      | 2461666      | 2606428 | 144762                | PA2237         | PA2359 |
| C87      | 2787221      | 2828217 | 40996                 | PA2469         | PA2511 |
| C96      | 2705835      | 2863924 | 158089                | PA2422         | PA2535 |

\*For identical strains with the same deletion, only one strain is listed

†Coordinates of *P. aeruginosa* PAO1

‡*P. aeruginosa* strain PAO1 locus ID
